# Supplementary material
Source: publisher figshare collection journal article supplement (https://frontiersin.figshare.com/ndownloader/files/21913299)
Supplement: Supplementary file [file 21913299]

**Supplementary Table 1: The effect of radiation exposure and TAT-Gap19 on different atherosclerosis inflammatory markers at 24 h, 48 h, 72 h and 7 d post exposure in TICAE and TIME cells.** The effect of 0.1 Gy and 5 Gy of X-rays exposure was compared to 0 Gy controls, while 0 Gy, 0.1 Gy and 5 Gy TAT-Gap19 was compared to the respective radiation dose of the control (IR only) conditions.

| Cytokines     | TIME point after IR | TICAE cells |        |      |               |        |      | TIME cells |        |      |              |        |      |
|---------------|---------------------|-------------|--------|------|---------------|--------|------|------------|--------|------|--------------|--------|------|
|               |                     | IR          |        |      | IR+ TAT-Gap19 |        |      | IR         |        |      | IR+TAT-Gap19 |        |      |
|               |                     | 0 Gy        | 0.1 Gy | 5 Gy | 0 Gy          | 0.1 Gy | 5 Gy | 0 Gy       | 0.1 Gy | 5 Gy | 0 Gy         | 0.1 Gy | 5 Gy |
| IL-6          | 24 h                |             |        |      |               |        |      |            |        |      |              |        |      |
| MCP-1         |                     |             |        |      |               |        |      |            |        |      |              |        |      |
| PCAM-1        |                     |             |        |      |               |        |      |            |        |      |              |        |      |
| IL-1 $\beta$  |                     |             |        |      |               |        |      |            |        |      |              |        |      |
| TNF- $\alpha$ |                     |             |        |      |               |        |      |            |        |      |              |        |      |
| CRP           |                     |             |        |      |               |        |      |            |        |      |              |        |      |
| VCAM-1        |                     |             |        |      |               |        |      |            |        |      |              |        |      |
| E-Selectin    |                     |             |        |      |               |        |      |            |        |      |              |        |      |
| ICAM-1        |                     |             |        |      |               |        |      |            |        |      |              |        |      |
| Endothelin-1  |                     |             |        |      |               |        |      |            |        |      |              |        |      |
| IL-6          | 48 h                |             |        |      |               |        |      |            |        |      |              |        |      |
| MCP-1         |                     |             |        |      |               |        |      |            |        |      |              |        |      |
| PCAM-1        |                     |             |        |      |               |        |      |            |        |      |              |        |      |
| IL-1 $\beta$  |                     |             |        |      |               |        |      |            |        |      |              |        |      |
| TNF- $\alpha$ |                     |             |        |      |               |        |      |            |        |      |              |        |      |
| CRP           |                     |             |        |      |               |        |      |            |        |      |              |        |      |
| VCAM-1        |                     |             |        |      |               |        |      |            |        |      |              |        |      |
| IL-6          | 72 h                |             |        |      |               |        |      |            |        |      |              |        |      |
| MCP-1         |                     |             |        |      |               |        |      |            |        |      |              |        |      |
| PECAM-1       |                     |             |        |      |               |        |      |            |        |      |              |        |      |
| IL-1 $\beta$  |                     |             |        |      |               |        |      |            |        |      |              |        |      |
| TNF- $\alpha$ |                     |             |        |      |               |        |      |            |        |      |              |        |      |
| CRP           |                     |             |        |      |               |        |      |            |        |      |              |        |      |
| VCAM-1        |                     |             |        |      |               |        |      |            |        |      |              |        |      |
| E-Selectin    |                     |             |        |      |               |        |      |            |        |      |              |        |      |
| IL-8          |                     |             |        |      |               |        |      |            |        |      |              |        |      |
| ICAM-1        |                     |             |        |      |               |        |      |            |        |      |              |        |      |
| Endothelin-1  |                     |             |        |      |               |        |      |            |        |      |              |        |      |
| PAI-1         |                     |             |        |      |               |        |      |            |        |      |              |        |      |
| IL-6          | 7 d                 |             |        |      |               |        |      |            |        |      |              |        |      |
| MCP-1         |                     |             |        |      |               |        |      |            |        |      |              |        |      |
| IL-1 $\beta$  |                     |             |        |      |               |        |      |            |        |      |              |        |      |
| VCAM-1        |                     |             |        |      |               |        |      |            |        |      |              |        |      |
| IL-8          |                     |             |        |      |               |        |      |            |        |      |              |        |      |
| Endothelin-1  |                     |             |        |      |               |        |      |            |        |      |              |        |      |
| IGFBP-7       |                     |             |        |      |               |        |      |            |        |      |              |        |      |
| GDF-15        |                     |             |        |      |               |        |      |            |        |      |              |        |      |

|  |                                         |
|--|-----------------------------------------|
|  | No significant changes                  |
|  | A significant increase, when $p < 0.05$ |
|  | A significant increase, when $p < 0.01$ |
|  | A significant decrease, when $p < 0.05$ |
|  | A significant decrease, when $p < 0.01$ |
